# Supplementary material for: Regulation of prokineticin 2 expression by light and the circadian clock
Source: PubMed Central journal article supplement (PMC555564; doi:10.1186/1471-2202-6-17), 2005-03-11

**ZT1****4****7****10****13****16****19****22****Cry**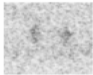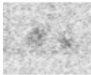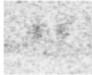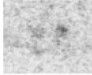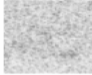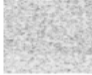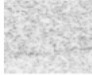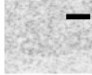**WT**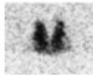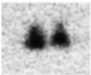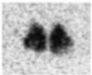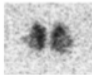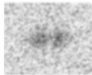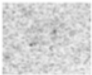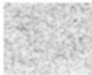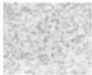

Supplement: 1471-2202-6-17-S2.pdf [file 1471-2202-6-17-S2.pdf]
